# Supplementary material
Source: ML conference proceedings conference paper supplement (https://www.ecva.net/papers/eccv_2020/papers_ECCV/html/123550358_ECCV_2020_paper.php)

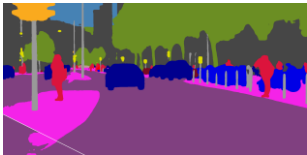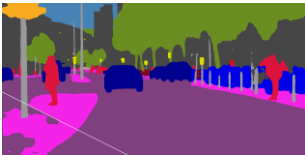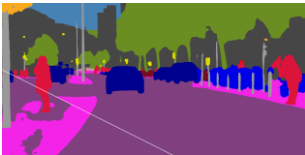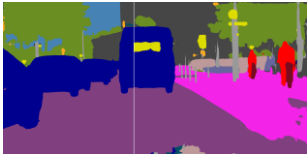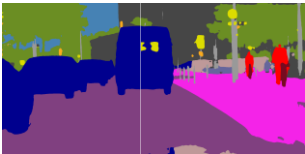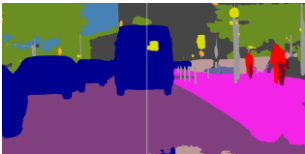

Supplement: Supplementary file 1 [file 123550358-supp.zip]

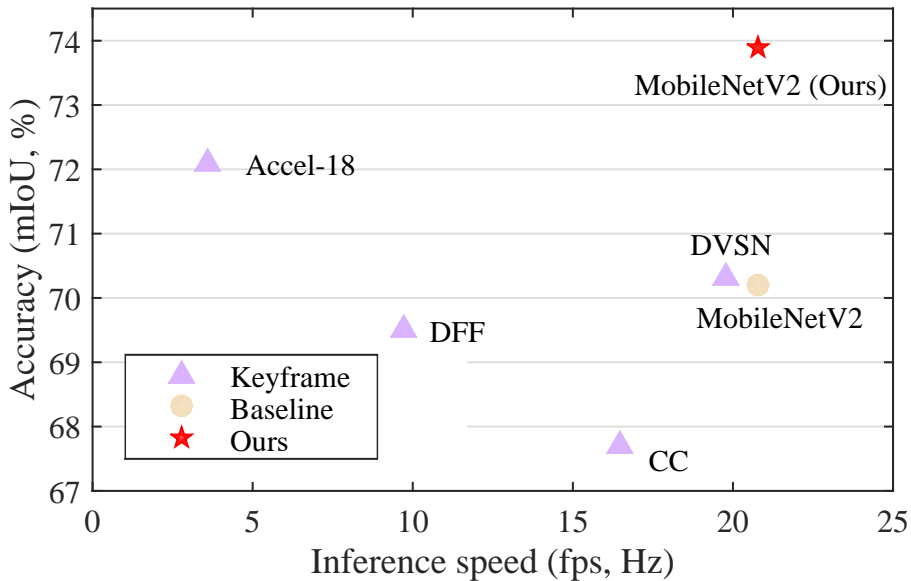

Supplement: Supplementary file 2 [file 123550358-supp.zip]

Distillation loss    Optimized

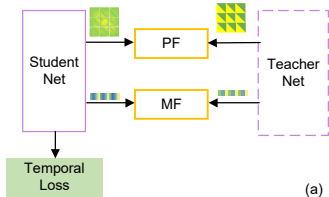

(a)

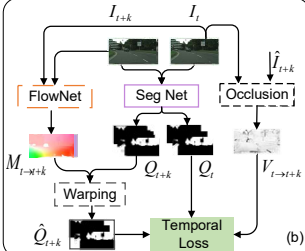

(b)

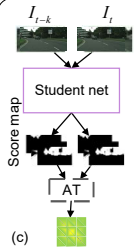

(c)

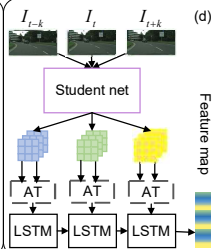

(d)

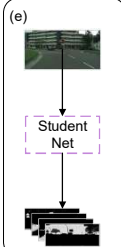

(e)

Supplement: Supplementary file 3 [file 123550358-supp.zip]

Keyframe

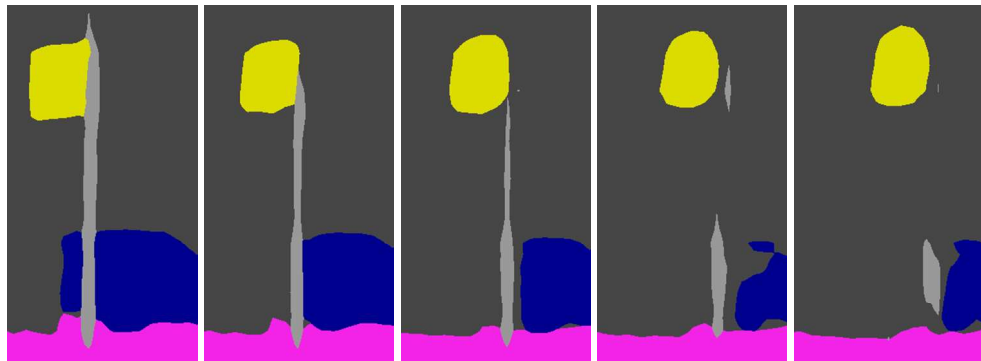

Ours

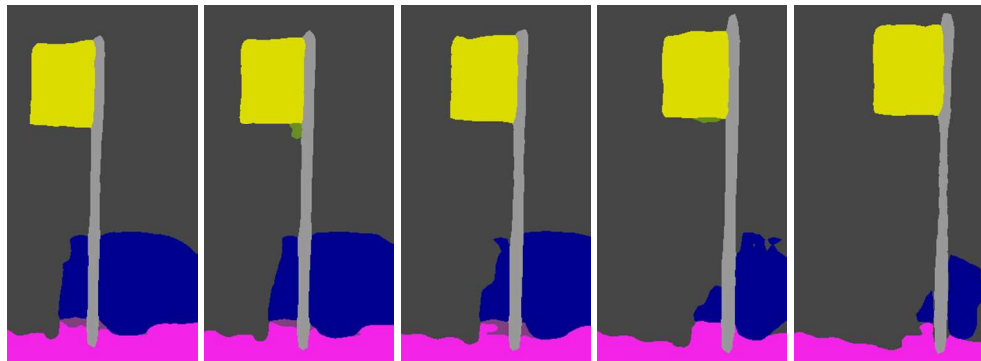

Baseline

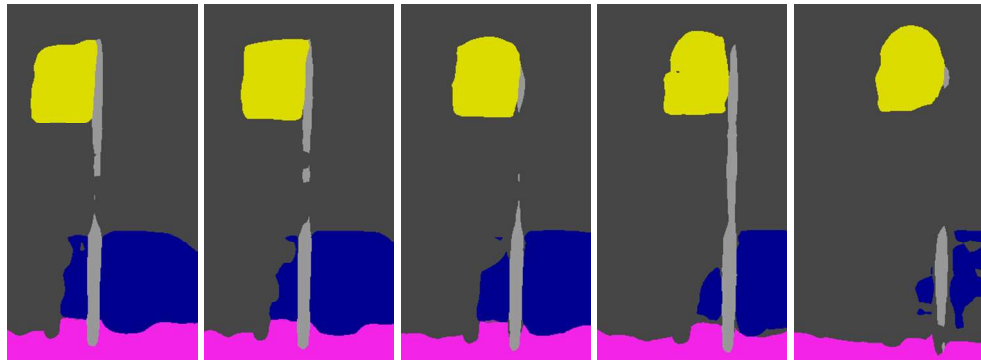

k

k+1

k+2

k+3

k+4

Supplement: Supplementary file 4 [file 123550358-supp.zip]

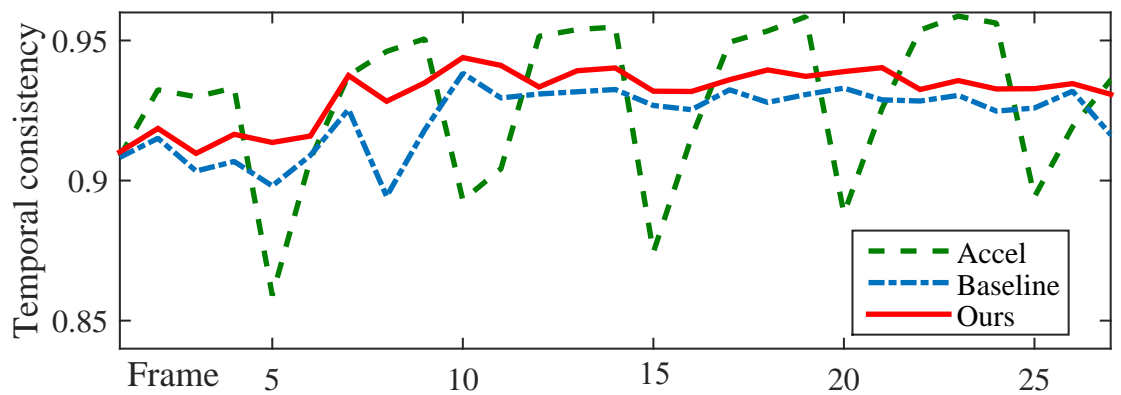

Supplement: Supplementary file 5 [file 123550358-supp.zip]

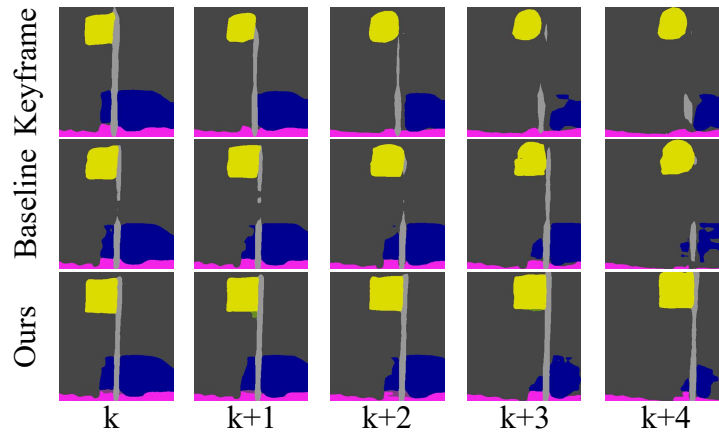

Supplement: Supplementary file 6 [file 123550358-supp.zip]
